# Supplementary material for: A metabonomic analysis of the effect of quercetin on toxicity induced by chronic exposure to low-level dichlorvos in rat plasma
Source: Royal Society of Chemistry journal article supplement (doi:10.1039/c4mb00299g), 2014-07-16
Supplement: c4mb00299g3.pdf [file c4mb00299g3.pdf]

**Supplemental Table 1** Summary of intensity values of biomarkers detected in negative ESI mode in rat plasma

| Groups | Peak intensity (mean $\pm$ SD, n = 11) |                     |                   |                    |                         |
|--------|----------------------------------------|---------------------|-------------------|--------------------|-------------------------|
|        | Arachidonic acid                       | LysoPE(16:0/0:0)    | P-cresol          | Isorhamnetin       | Quercetin-3-glucuronide |
| C      | 146.51 $\pm$ 16.23                     | 48.37 $\pm$ 10.77   | 3.88 $\pm$ 1.74   | 0                  | 0                       |
| D      | 97.56 $\pm$ 15.20**                    | 77.24 $\pm$ 14.67** | 9.35 $\pm$ 2.49** | 0                  | 0                       |
| D+Q1   | 113.19 $\pm$ 20.57**                   | 74.85 $\pm$ 9.48**  | 8.96 $\pm$ 2.56** | 1.65 $\pm$ 1.02*** | 3.19 $\pm$ 1.79***      |
| D+Q2   | 118.13 $\pm$ 32.48**                   | 71.08 $\pm$ 14.97** | 8.68 $\pm$ 3.83** | 1.91 $\pm$ 1.19*** | 3.47 $\pm$ 2.05***      |
| D+Q3   | 120.77 $\pm$ 18.51*#                   | 63.90 $\pm$ 14.89*# | 6.51 $\pm$ 2.26*# | 2.28 $\pm$ 1.13*** | 3.87 $\pm$ 1.72***      |
| Q1     | 146.71 $\pm$ 22.90                     | 48.80 $\pm$ 10.08   | 3.87 $\pm$ 1.82   | 1.76 $\pm$ 1.01**  | 3.09 $\pm$ 1.51**       |
| Q2     | 146.42 $\pm$ 18.51                     | 48.32 $\pm$ 12.31   | 3.88 $\pm$ 1.77   | 2.11 $\pm$ 1.07**  | 3.39 $\pm$ 2.35**       |
| Q3     | 146.71 $\pm$ 24.79                     | 48.71 $\pm$ 15.24   | 3.88 $\pm$ 1.82   | 2.34 $\pm$ 1.10**  | 3.93 $\pm$ 1.48**       |

Note: C, control group; D, DDVP-treated group; DQ1, low-dose quercetin plus DDVP-treated group; DQ2, middle-dose quercetin plus DDVP-treated group; DQ3, high-dose quercetin plus DDVP-treated group; Q1, low-dose quercetin-treated group; Q2, middle-dose quercetin-treated group; Q3, high-dose quercetin-treated group. Values expressed as mean  $\pm$  SD(n=11). \*Significantly different from control rats at  $P < 0.05$ (ANOVA), \*\*Significantly different from control rats at  $P < 0.01$ (ANOVA), #Significantly different from DDVP rats at  $P < 0.05$ (ANOVA), ##Significantly different from DDVP rats at  $P < 0.01$ (ANOVA).

**Supplemental Table 2** Summary of intensity values of biomarkers detected in positive ESI mode in rat plasma

| Groups | Peak intensity (mean $\pm$ SD, n = 11) |                      |                    |                      |                   |                    |
|--------|----------------------------------------|----------------------|--------------------|----------------------|-------------------|--------------------|
|        | LysoPC(16:0/0:0)                       | LysoPC(0:0/18:0)     | LysoPC(15:0/0:0)   | Sphingosine          | C16 Sphinganine   | Tryptophan         |
| C      | 84.55 $\pm$ 0.83                       | 352.51 $\pm$ 28.38   | 74.25 $\pm$ 1.16   | 153.07 $\pm$ 19.42   | 6.23 $\pm$ 1.30   | 20.02 $\pm$ 5.62   |
| D      | 86.17 $\pm$ 0.67**                     | 404.98 $\pm$ 14.41** | 77.10 $\pm$ 1.32** | 113.13 $\pm$ 13.44** | 3.16 $\pm$ 0.99** | 28.94 $\pm$ 3.47** |
| D+Q1   | 85.78 $\pm$ 0.71**                     | 400.23 $\pm$ 28.31** | 76.89 $\pm$ 1.73** | 124.60 $\pm$ 16.55** | 3.04 $\pm$ 1.42** | 25.39 $\pm$ 3.91** |
| D+Q2   | 85.65 $\pm$ 0.66**                     | 396.65 $\pm$ 10.50** | 76.82 $\pm$ 1.36** | 127.40 $\pm$ 28.19** | 3.40 $\pm$ 1.62** | 25.12 $\pm$ 2.56** |
| D+Q3   | 85.36 $\pm$ 0.84*#                     | 376.84 $\pm$ 14.79*# | 75.63 $\pm$ 1.55*# | 134.05 $\pm$ 11.96*# | 4.77 $\pm$ 1.41*# | 24.53 $\pm$ 4.11*# |
| Q1     | 84.54 $\pm$ 0.81                       | 353.89 $\pm$ 26.60   | 74.35 $\pm$ 1.09   | 152.92 $\pm$ 15.06   | 6.21 $\pm$ 1.58   | 20.50 $\pm$ 3.41   |
| Q2     | 84.74 $\pm$ 0.47                       | 354.55 $\pm$ 23.61   | 74.29 $\pm$ 0.82   | 153.01 $\pm$ 19.49   | 6.24 $\pm$ 1.75   | 20.16 $\pm$ 3.51   |
| Q3     | 84.59 $\pm$ 0.57                       | 352.54 $\pm$ 24.39   | 74.43 $\pm$ 1.14   | 153.03 $\pm$ 12.27   | 6.23 $\pm$ 0.87   | 20.21 $\pm$ 3.71   |

Note: C, control group; D, DDVP-treated group; DQ1, low-dose quercetin plus DDVP-treated group; DQ2, middle-dose quercetin plus DDVP-treated group; DQ3, high-dose quercetin plus DDVP-treated group; Q1, low-dose quercetin-treated group; Q2, middle-dose quercetin-treated group; Q3, high-dose quercetin-treated group. Values expressed as mean  $\pm$  SD(n=11) \*Significantly different from control rats at P < 0.05(ANOVA), \*\*Significantly different from control rats at P < 0.01(ANOVA), #Significantly different from DDVP rats at P < 0.05(ANOVA), ##Significantly different from DDVP rats at P < 0.01(ANOVA).
